# Supplementary material for: Fabrication of ROS-responsive nanoparticles by modifying the interior pore-wall of mesoporous silica for smart delivery of azoxystrobin
Source: Royal Society of Chemistry journal article supplement (doi:10.1039/d3tb01954c), 2023-01-01
Supplement: d3tb01954c1.pdf [file d3tb01954c1.pdf]

## Supporting Information

### Fabrication of ROS-responsive Mesoporous Silica Nanoparticles with interior pore-wall modification for smart azoxystrobin delivery

Tuqiang Gao & Borui Zhang, Zhaochen Wu, Qizhen Zhang, Xin Shi, Congying Zhou,  
Xiaofang Liu, Pengfei Liu\*, Xili Liu

College of Plant Protection, China Agricultural University, Beijing, 100193

&These authors contributed equally to this work and should be considered co-first authors.

\*Corresponding authors, Email: [pengfeiliu@cau.edu.cn](mailto:pengfeiliu@cau.edu.cn)

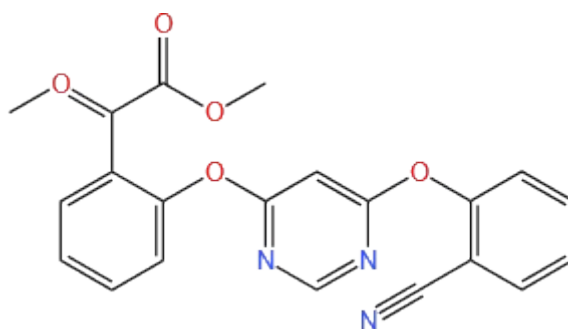

Figure S1: Chemical structures of azoxystrobin (AZOX)

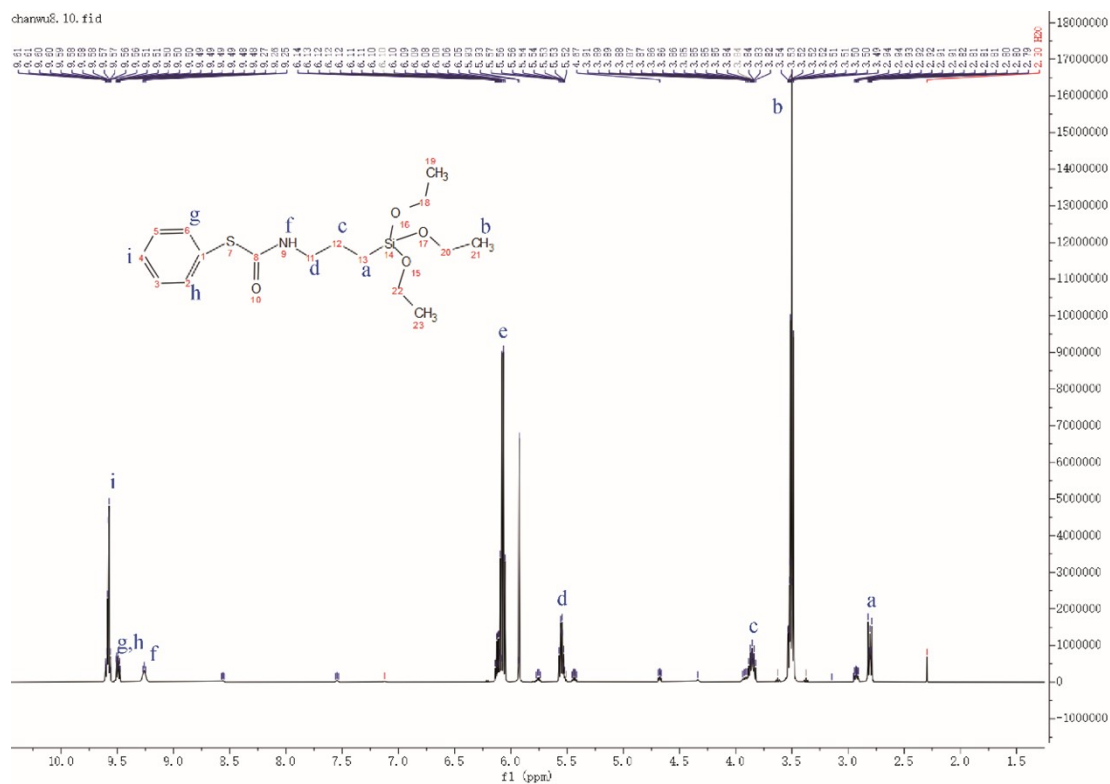

Table S1. Mesoporous Structure Characterization of MSN-PHS and MSN-PHS-AZOX.

| Sample       | SBET ( $\text{m}^2/\text{g}$ ) | Pore volume ( $\text{cm}^3/\text{g}$ ) | Pore size (nm) |
|--------------|--------------------------------|----------------------------------------|----------------|
| MSN-PHS      | 979.566                        | 0.691                                  | 3.404          |
| MSN-PHS-AZOX | 725.36                         | 0.418                                  | 3.063          |

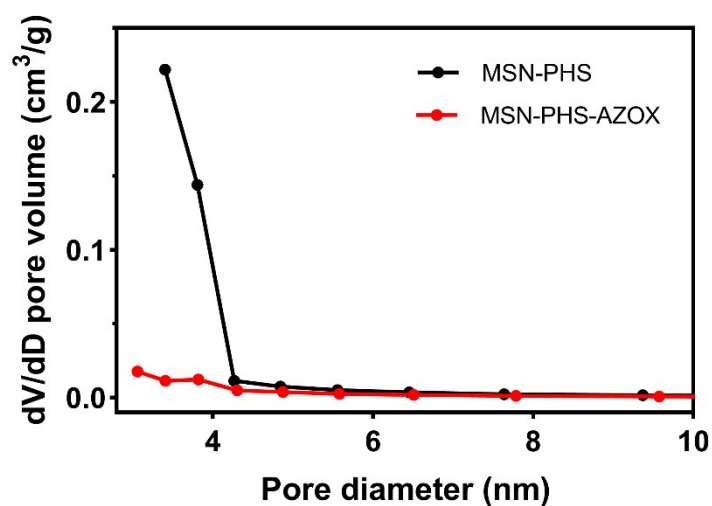

Figure S3. Pore size distribution of MSN-PHS and MSN-PHS-AZOX.

Table S2. Different fitted kinetic equations of MSN-PHS-AZOX in aqueous 30% methanol solution of 0, 50, 200, 500  $\mu\text{M}$   $\text{H}_2\text{O}_2$ .

| Concentration<br>( $\mu\text{M}$ ) | First-order                    |       | Peppas               |       | Higuchi                    |       |
|------------------------------------|--------------------------------|-------|----------------------|-------|----------------------------|-------|
|                                    | Kinetic equation               | $R^2$ | Kinetic equation     | $R^2$ | Kinetic equation           | $R^2$ |
| 0                                  | $y = 14.64 e^{(0.28x)} + 1.79$ | 0.99  | $y = 11.27 x^{0.35}$ | 0.99  | $y = 4.85 x^{1/2} + 8.10$  | 0.96  |
| 50                                 | $y = 16.02 e^{(0.44x)} + 4.85$ | 0.99  | $y = 14.06 x^{0.34}$ | 0.98  | $y = 5.76 x^{1/2} + 10.30$ | 0.95  |
| 200                                | $y = 24.70 e^{(0.18x)} + 8.40$ | 0.99  | $y = 14.42 x^{0.37}$ | 0.98  | $y = 7.31 x^{1/2} + 8.97$  | 0.95  |
| 500                                | $y = 23.28 e^{(0.44x)} + 2.00$ | 0.98  | $y = 17.36 x^{0.36}$ | 0.94  | $y = 8.26 x^{1/2} + 10.53$ | 0.90  |

Table S3. Virulence regression equation of AZOX TC, AZOX SC, MSN-PHS-AZOX on mycelial growth of *B. cinerea* with and without H<sub>2</sub>O<sub>2</sub> in the medium.

| Treatment                                       | Fitted equation        | EC50 (µg/mL) | R <sup>2</sup> |
|-------------------------------------------------|------------------------|--------------|----------------|
| AZOX TC                                         | $y = 0.7440x + 6.0478$ | 0.0668       | 0.9117         |
| AZOX SC                                         | $y = 0.7163x + 5.9824$ | 0.0726       | 0.9075         |
| MSN-PHS-AZOX with H <sub>2</sub> O <sub>2</sub> | $y = 0.6583x + 5.9136$ | 0.0776       | 0.8888         |
| MSN-PHS-AZOX                                    | $y = 0.8402x + 5.4666$ | 0.2801       | 0.9310         |

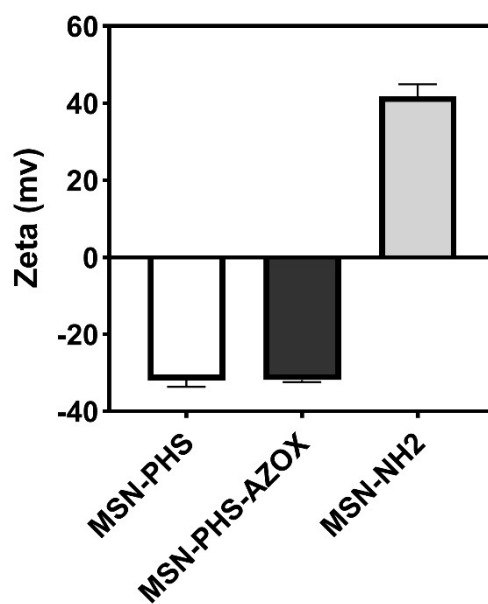

Figure S4. The Zeta potential of MSN-PHS, MSN-PHS-AZOX, and MSN-NH<sub>2</sub>.

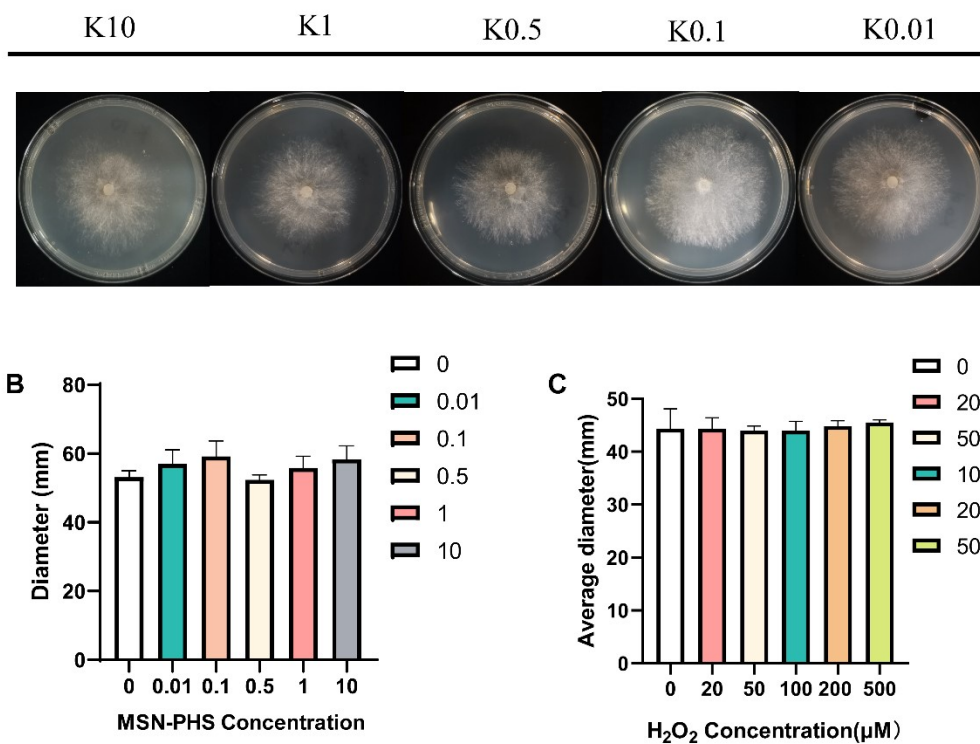

Figure S5. The inhibitory effect of MSN-PHS nanocarriers (a, b) and H<sub>2</sub>O<sub>2</sub> (c) on *Botrytis cinerea*.

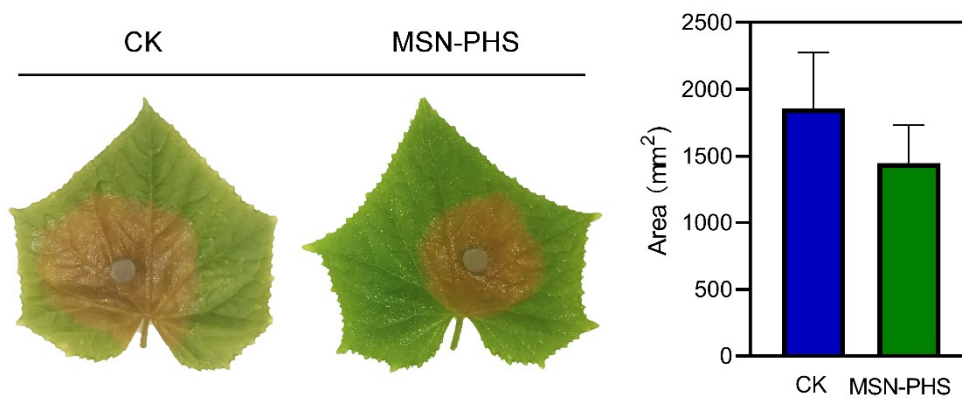

Figure S6. The inhibitory effect of MSN-PHS nanocarriers to *B. cinerea* on the lesion development on cucumber leaves.
